# Supplementary material for: Staphylococcus aureus-Cure-Associated Antigens Elicit Type 3 Immune Memory T Cells
Source: MDPI journal article supplement (doi:10.3390/antibiotics11121831), 2022-12-16
Supplement: s1 [file s1]

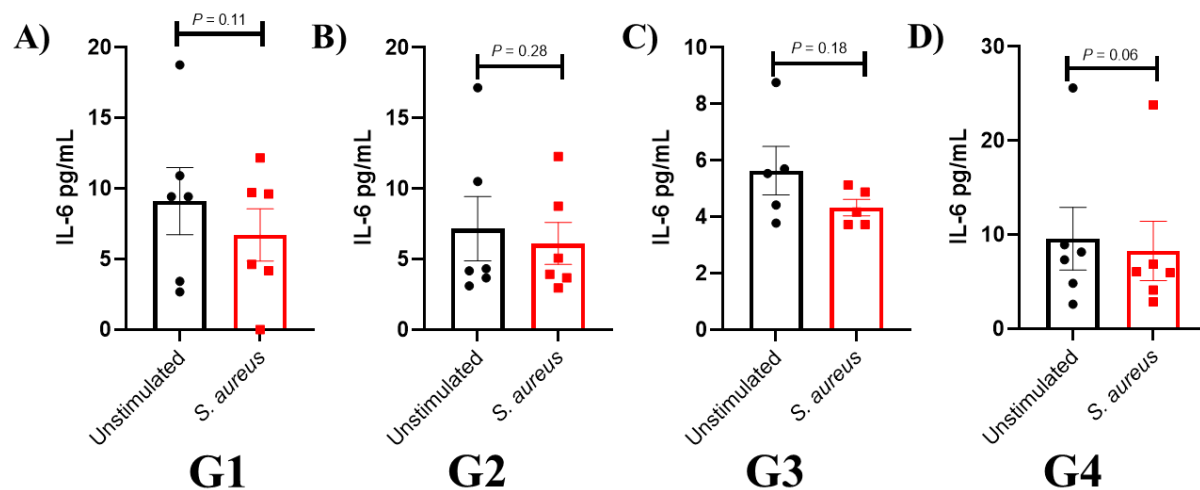

**Figure S1.** Interleukin-6 (IL-6) concentration in the supernatant of the immunized and non-immunized mouse spleen cells culture under unstimulated (basal) and *Staphylococcus aureus* stimulated conditions. G1: unvaccinated control group; G2: GM-CSF DNA plasmid DNA vaccination; G3: EF-G + ENO + PGK *S. aureus* recombinant proteins vaccination; G4: EF-G + ENO + PGK *S. aureus* recombinant proteins vaccination associated with GM-CSF DNA plasmid DNA vaccine; EF-G: elongation factor-G; ENO: enolase; and PGK: phosphoglycerate kinase. [Student paired t-test].
